# Supplementary material for: Heterogeneous Porphyromonas gingivalis LPS modulates immuno-inflammatory response, antioxidant defense and cytoskeletal dynamics in human gingival fibroblasts
Source: PubMed Central journal article supplement (PMC4990928; doi:10.1038/srep29829), 2016-08-19
Supplement: srep29829-s1.pdf [file srep29829-s1.pdf]

**Heterogeneous *Porphyromonas gingivalis* LPS modulates immuno-inflammatory response, antioxidant defense and cytoskeletal dynamics in human gingival fibroblasts**

Thanuja D.K. Herath<sup>1,6</sup>, Richard P. Darveau<sup>2</sup>, Chaminda J. Seneviratne<sup>3</sup>, Cun-Yu Wang<sup>4</sup>, Yu Wang<sup>5</sup> & Lijian Jin<sup>6\*</sup>

<sup>1</sup>National Dental Centre Singapore, Singapore<sup>2</sup>, School of Dentistry, University of Washington, Seattle, USA, <sup>3</sup>Oral Sciences, Faculty of Dentistry, National University of Singapore, Singapore, <sup>4</sup>School of Dentistry, University of California Los Angeles, Los Angeles, USA, <sup>5</sup>Department of Pharmacology & Pharmacy, Li Ka Shing Faculty of Medicine, and <sup>6</sup>Faculty of Dentistry, The University of Hong Kong, Hong Kong SAR, China.

\*Corresponding author. E-mail: [ljjin@hku.hk](mailto:ljjin@hku.hk)

**A**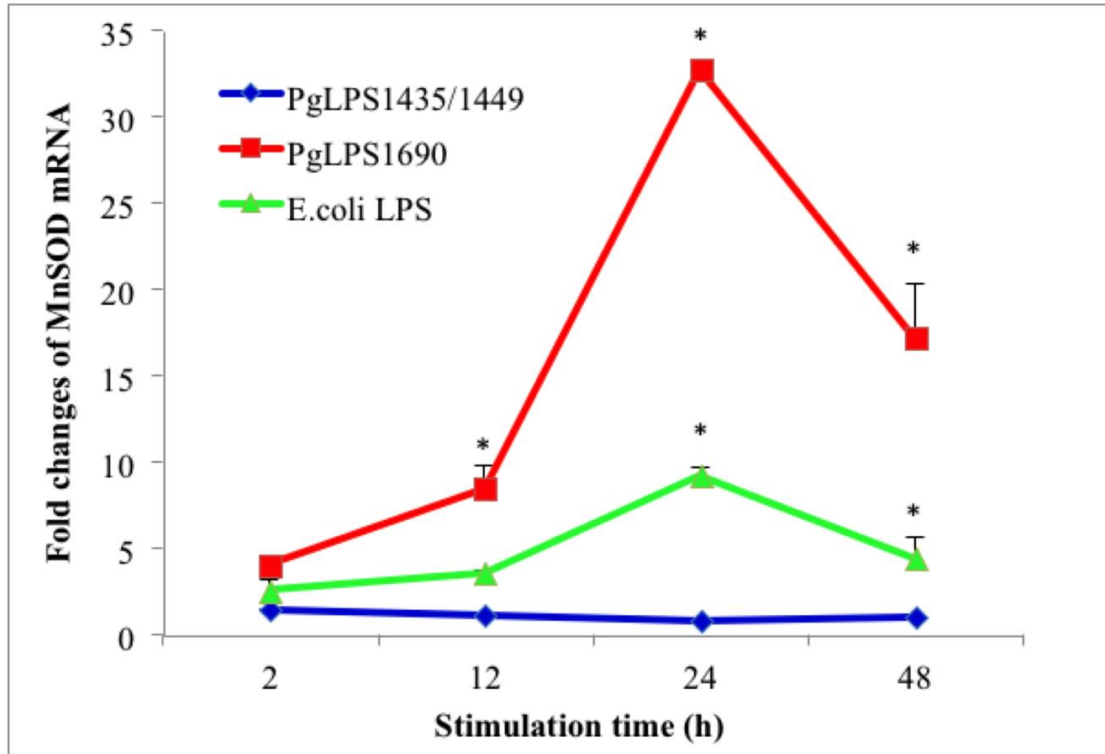**B**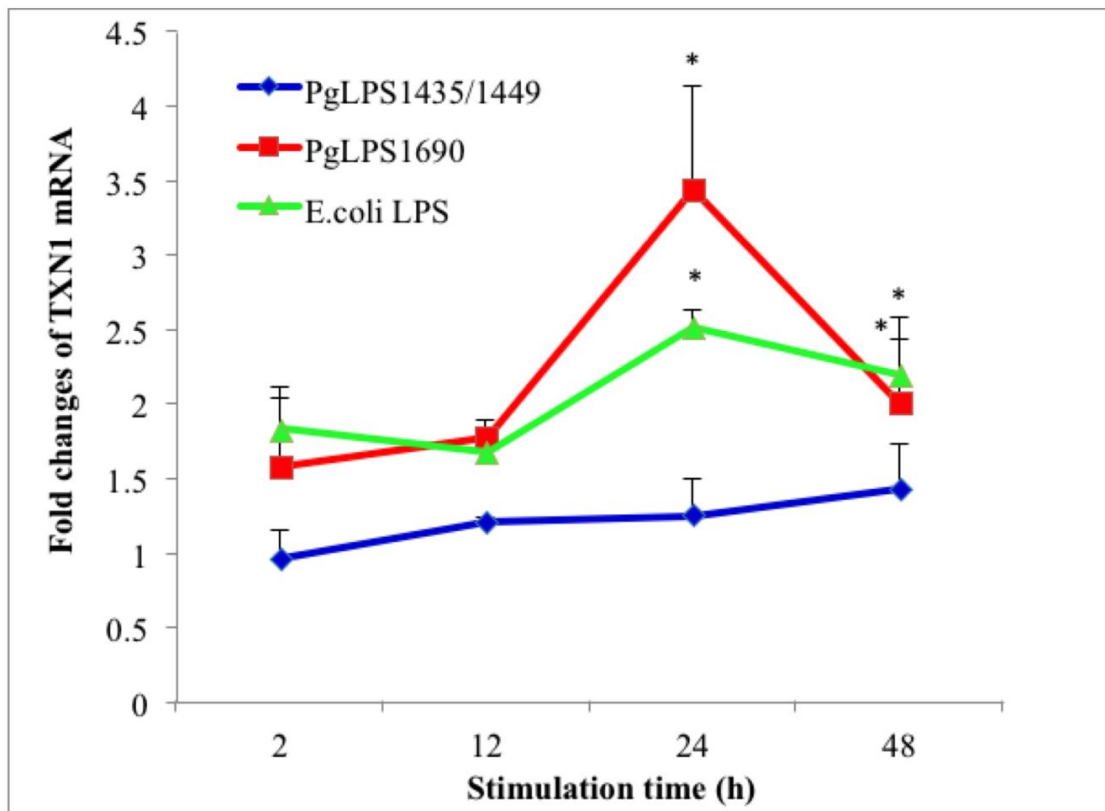

**Figure S1. Time-dependent study of the expression of MnSOD and TXN1 genes in *P. gingivalis* LPS treated HGFs.** Cells were treated with *P. gingivalis* LPS and *E. coli* LPS at 1 µg/ml for 2 to 48 h in a time-dependent manner. After LPS stimulation, total mRNA was prepared and gene expression of MnSOD (A) and TXN1 (B) mRNAs in the cellular fractions was determined by real-time qPCR. Fold changes in gene expression were shown with reference to internal control β-actin. Each bar represents the mean±SD of three independent experiments with three replicates. \*Significant difference with a *P*-value < 0.05 as compared with the controls without LPS treatment.

| Spot no                                         | Protein <sup>a</sup>                     | Accession No | Gene <sup>b</sup> | MW <sup>c</sup> (kDa) | Protein Score | Protein PI <sup>d</sup> | Peptide count <sup>e</sup> | Protein score (CI %) | Fold regulation<br>↑<br>up<br>↓<br>down | Fold change ± SD <sup>f</sup> |                            |                       |
|-------------------------------------------------|------------------------------------------|--------------|-------------------|-----------------------|---------------|-------------------------|----------------------------|----------------------|-----------------------------------------|-------------------------------|----------------------------|-----------------------|
|                                                 |                                          |              |                   |                       |               |                         |                            |                      |                                         | Control                       | PgLPS <sub>1435/1449</sub> | PgLPS <sub>1690</sub> |
| <b>Structural proteins</b>                      |                                          |              |                   |                       |               |                         |                            |                      |                                         |                               |                            |                       |
| 1                                               | Myosin, light polypeptide 6              | gi 119617307 | MYL6              | 18310.6               | 473           | 4.68                    | 10                         | 100                  | PgLPS <sub>1690</sub> ↑                 | 1                             | 2±0.2                      | 6.4±0.4               |
| 2                                               | Cofilin-1                                | gi 5031635   | CFL1              | 18718.7               | 48            | 8.22                    | 8                          | 100                  | both Pg LPS ↓                           | 1                             | 0.2±0.1                    | 0.2±0.2               |
| <b>Oxidative stress and antioxidant defense</b> |                                          |              |                   |                       |               |                         |                            |                      |                                         |                               |                            |                       |
| 3                                               | Human SH3 Binding Glutamic-rich protein  | gi 12230575  | SH3BGRL           | 12766.4               | 111           | 5.22                    | 5                          | 100                  | PgLPS <sub>1690</sub> ↑                 | 1                             | 1.3±0.1                    | 2.2±0.2               |
| 4                                               | Perilipin-3 isoform 3                    | gi 255958306 | PLIN3             | 45946.3               | 543           | 5.28                    | 15                         | 100                  | PgLPS <sub>1435</sub> ↓                 | 1                             | 0.5±0.1                    | 3.5±0.2               |
| 5                                               | Protein disulfide isomerase              | gi 860986    | PDIA3             | 57042.9               | 418           | 6.1                     | 23                         | 100                  | both Pg LPS ↑                           | 1                             | 3.6±0.2                    | 4.4±0.1               |
| 6                                               | Protein disulfide isomerase A3 precursor | gi 3659980   | PDIA3             | 57145.9               | 511           | 5.98                    | 18                         | 100                  | both Pg LPS ↑                           | 1                             | 2.4±0.2                    | 3.3±0.1               |
| 7                                               | Nitric oxide synthase 2A (inducible)     | gi 119571435 | NOS2A             | 111401                | 52            | 8.72                    | 15                         | 41.6                 | PgLPS <sub>1690</sub> ↑                 | 1                             | 1.2±0.1                    | 2.6±0.2               |
| 8                                               | Peroxiredoxin 1                          | gi 55959887  | PRDX1             | 19134.7               | 349           | 6.41                    | 10                         | 100                  | PgLPS <sub>1690</sub> ↑                 | 1                             | 1.4±0.2                    | 4.2±0.2               |
| 9                                               | Heat shock protein, alpha-               | gi 45786106  | HSPB6             | 17198                 | 152           | 5.95                    | 4                          | 100                  | PgLPS <sub>1690</sub> ↑                 | 1                             | 1.4±0.2                    | 2.1±0.3               |
| 10                                              | Superoxide dismutase [Cu-Zn]             | gi 134611    | SOD               | 16154                 | 161           | 5.7                     | 5                          | 100                  | both Pg LPS ↑                           | 1                             | 3.0±0.2                    | 3.3±0.2               |
| <b>Protein degradation</b>                      |                                          |              |                   |                       |               |                         |                            |                      |                                         |                               |                            |                       |

|                                        |                                                     |              |           |         |     |      |    |     |                         |                                      |         |         |
|----------------------------------------|-----------------------------------------------------|--------------|-----------|---------|-----|------|----|-----|-------------------------|--------------------------------------|---------|---------|
| 11                                     | Cathepsin B In Complex With Stefin A                | gi 262368170 | CTSB      | 28595.1 | 209 | 5.23 | 8  | 100 | both Pg LPS ↑           | 1                                    | 2.3±0.2 | 2.4±0.1 |
| 12                                     | Lysosomal proteinase cathepsin B                    | gi 181178    | CTSB      | 23632.9 | 258 | 5.19 | 5  | 100 | both Pg LPS ↑           | 1                                    | 2.4±0.1 | 3.2±0.2 |
| 13                                     | Cathepsin B                                         | gi 181178    | CTSB      | 23632.9 | 185 | 5.19 | 6  | 100 | both Pg LPS ↑           | 1                                    | 2.3±0.2 | 2.3±0.1 |
| <b>Enzymes/transcription factors</b>   |                                                     |              |           |         |     |      |    |     |                         |                                      |         |         |
| 14                                     | Translation elongation factor 1 alpha Mitochondrial | gi 15277711  | EEF1A1L14 | 43282.4 | 287 | 8.94 | 6  | 100 | PgLPS <sub>1435</sub> ↑ | 1                                    | 4.1±0.1 | 1.8±0.1 |
| 15                                     | Voltage-dependent anion-selective channel protein 1 | gi 4507879   | VDAC1     | 30867.6 | 249 | 8.62 | 13 | 100 | PgLPS <sub>1435</sub> ↑ | 1                                    | 3.5±0.1 | 1.1±0.1 |
| 16                                     | Human Manganese Superoxide Dismutase chain A        | gi 2780818   | SOD2      | 22290.3 | 237 | 6.86 | 6  | 100 | PgLPS <sub>1690</sub> ↑ | 1                                    | 1.2±0.1 | 3.1±0.3 |
| <b>Pro- and anti-apoptotic factors</b> |                                                     |              |           |         |     |      |    |     |                         |                                      |         |         |
| 17                                     | Peptidylprolyl isomerase A (cyclophilin A)          | gi 3659980   | PPIA      | 18208.9 | 296 | 7.44 | 10 | 100 | both Pg LPS ↑           | 1                                    | 2.3±0.2 | 5.3±0.2 |
| 18                                     | Peptidylprolyl isomerase A (cyclophilin A)          | gi 13937981  | PPIA      | 18228   | 181 | 7.68 | 10 | 100 | both Pg LPS ↑           | 1                                    | 2.7±0.3 | 5.6±0.4 |
| 19                                     | Human galectin1                                     | gi 42542977  | LGALS1    | 14868.3 | 285 | 5.34 | 8  | 100 | both Pg LPS ↑           | 1                                    | 2.4±0.1 | 2.2±0.1 |
| 20                                     | Chain A, Annexin A2                                 | gi 56966699  | ANXA2     | 38865.9 | 365 | 6.92 | 17 | 100 | PgLPS <sub>1690</sub>   | 1                                    | 4.5±0.3 | 2.2±0.3 |
| 21                                     | Chain A human annexin A2-                           | gi 56967118  | ANXA2     | 36630.8 | 442 | 8.32 | 17 | 100 | PgLPS <sub>1435</sub> ↑ | Unique in PgLPS <sub>1435/1449</sub> |         |         |
| 22                                     | Annexin A2                                          | gi 73909156  | ANXA2     | 40730.9 | 379 | 8.41 | 18 | 100 | PgLPS <sub>1435</sub> ↑ |                                      |         |         |
| 23                                     | Programmed cell death protein 5                     | gi 6226219   | PDCD5     | 14276.3 | 30  | 5.77 | 5  | 100 | PgLPS <sub>1690</sub> ↑ | 1                                    | 1.5±0.3 | 2±0.2   |

## Miscellaneous

|    |                                                   |              |       |         |     |       |    |       |                         |   |         |         |
|----|---------------------------------------------------|--------------|-------|---------|-----|-------|----|-------|-------------------------|---|---------|---------|
| 24 | TPM4-ALK fusion oncoprotein                       | gi 10441386  | TPM4  | 27570   | 347 | 4.77  | 11 | 100   | both Pg LPS ↑           | 1 | 2.6±0.0 | 2.7±0.1 |
| 25 | Human Nicotinamide N-Methyltransferase            | gi 118138435 | NNMT  | 31863.1 | 210 | 6.5   | 6  | 100   | PgLPS <sub>1690</sub> ↑ | 1 | 1.4±0.1 | 3.5±0.1 |
| 26 | Clathrin light chain A                            | gi 6005993   | CLTA  | 27174.1 | 154 | 4.43  | 6  | 100   | PgLPS <sub>1690</sub> ↑ | 1 | 2.5±0.2 | 3.6±0.1 |
| 27 | Human Triosephosphate Isomerase 1                 | gi 999892    | TPI1  | 26806.8 | 433 | 6.51  | 14 | 100   | PgLPS <sub>1435</sub> ↑ | 1 | 2.4±0.1 | 1.5±0.1 |
| 28 | T-complex protein 1 subunit alpha isoform a       | gi 57863257  | TCP1  | 60818.8 | 329 | 5.8   | 16 | 100   | both Pg LPS ↑           | 1 | 2.3±0.2 | 2.3±0.1 |
| 29 | T-complex protein 1 subunit alpha isoform a       | gi 57863257  | TCP1  | 60818.8 | 493 | 5.8   | 20 | 100   | both Pg LPS ↑           | 1 | 2.3±0.1 | 2.1±0.1 |
| 30 | Polypyrimidine tract-binding protein 1 isoform c  | gi 14165466  | PTBP1 | 57356.7 | 72  | 9.22  | 7  | 98.88 | PgLPS <sub>1435</sub> ↑ | 1 | 2.0±0.2 | 1.3±0.1 |
| 31 | Putative RNA binding protein KOC                  | gi 2105469   | KOC   | 64022.7 | 212 | 8.99  | 16 | 100   | PgLPS <sub>1690</sub> ↑ | 1 | 1.1±0.2 | 2.3±0.2 |
| 32 | Heterogeneous nuclear ribonucleoprotein C (C1/C2) | gi 119586801 | HNRPC | 19078.8 | 106 | 10.22 | 4  | 100   | PgLPS <sub>1435</sub> ↑ | 1 | 3.3±0.2 | 1.2±0.1 |
| 33 | Pyrophosphatase (inorganic) 1                     | gi 55962251  | PPA1  | 20254   | 62  | 5.07  | 2  | 83.54 | PgLPS <sub>1690</sub> ↑ | 1 | 1.6±0.2 | 2.3±0.2 |
| 34 | Ubiquitin carboxyl-terminal hydrolase isozyme L1  | gi 21361091  | UCHL1 | 25150.6 | 275 | 5.33  | 7  | 100   | PgLPS <sub>1690</sub> ↑ | 1 | 1.5±0.3 | 2±0.3   |

**Table S1. Differentially expressed cellular proteins in HGFs in response to *P. gingivalis* LPS<sub>1435/1449</sub> and LPS<sub>1690</sub> identified by 2DE-PAGE.**

Differentially regulated proteins in HGFs stimulated by two isoforms of *P. gingivalis* LPS, and these proteins correspond to spots whose volume changed (2-fold) after stimulation.

<sup>a</sup>Functional annotation was extracted from NCBIInr database.

<sup>b</sup>Genes were named according to the human genome data base (<http://www.ncbi.nlm.nih.gov>).

<sup>c,d</sup>Apparent mass and *pI* determined from 2-DGE.

<sup>e</sup>Peptide count indicates the no. of peptides matched and (%) reports the percent total sequence coverage.

<sup>f</sup>Differential protein expression (fold change) of corresponding protein between LPS-treated and control samples by PD Quest 7.0 (Bio-Rad).

| UniProtKB ID                                         | Description                            | Gene   | Peptides              |                       | Fold change<br>PgLPS / control |                       | P value    |
|------------------------------------------------------|----------------------------------------|--------|-----------------------|-----------------------|--------------------------------|-----------------------|------------|
|                                                      |                                        |        | PgLPS <sub>1435</sub> | PgLPS <sub>1690</sub> | PgLPS <sub>1435</sub>          | PgLPS <sub>1690</sub> |            |
| <b>Immuno-inflammatory activity</b>                  |                                        |        |                       |                       |                                |                       |            |
| IPI00295741                                          | Cathepsin B                            | CTSB   | 2                     | 3                     | 2.9                            | 2.2                   | 2.09E-05   |
| IPI00012887                                          | Cathepsin L1                           | CTSL1  | 1                     | 2                     | no                             | 4.2                   | 0.00127055 |
| IPI00011229                                          | Cathepsin D                            | CTSD   | 3                     | 2                     | 2.8                            | 2.5                   | 9.9E-20    |
| IPI00021828                                          | Cystatin_B                             | CSTB   | 1                     | 2                     | 3.8                            | 7                     | 0.00050334 |
| IPI00293276                                          | Macrophage migration inhibitory factor | MIF    | 1                     | 2                     | 2.7                            | 3                     | 0.01730835 |
| IPI00908577                                          | Annexin A1                             | ANXA1  | 4                     | 4                     | 2.4                            | 1.8                   | 9.9E-20    |
| IPI00418169                                          | Annexin A2                             | ANXA2  | 17                    | 17                    | 2.9                            | 1.8                   | 9.9E-20    |
| IPI00872379                                          | Annexin A5                             | ANXA5  | 11                    | 11                    | 2.7                            | 2.7                   | 9.9E-20    |
| IPI00221226                                          | Annexin A6                             | ANXA6  | 7                     | 7                     | 2.7                            | 2                     | 9.9E-20    |
| IPI00219219                                          | Galectin_1                             | LGALS1 | 2                     | 2                     | 3.4                            | 2.7                   | 4.1193E-05 |
| <b>Oxidative stress response/antioxidant defense</b> |                                        |        |                       |                       |                                |                       |            |
| IPI00640741                                          | Peroxiredoxin_1                        | PRDX1  | 4                     | 3                     | 3.5                            | 5.6                   | 9.9E-20    |
| IPI00027350                                          | Peroxiredoxin_2                        | PRDX2  | 1                     | 2                     | 3.5                            | 3.6                   | 3.5838E-06 |
| IPI00639945                                          | PRDX4 Protein                          | PRDX4  | 1                     | 2                     | 2.5                            | 3.6                   | 1.7535E-05 |
| IPI00375306                                          | Peroxiredoxin 5 isoform b              | PRDX5  |                       | 2                     | No                             | 3.6                   | 4.6742E-08 |

|             |                                             |          |    |    |     |     |            |
|-------------|---------------------------------------------|----------|----|----|-----|-----|------------|
| IPI00220301 | Peroxiredoxin_6                             | PRDX6    | 4  | 4  | 3.0 | 2.3 | 5.218E-15  |
| IPI00216298 | Thioredoxin                                 | TXN      | 2  | 3  | 2.1 | 2.2 | 4.2109E-09 |
| IPI00024919 | Thioredoxin_dependent peroxide reductase    | PRDX3    | 2  | 3  | 2.8 | 2.6 | 1.9772E-08 |
| IPI00106668 | perilipin_3 isoform 3                       | PLIN3    | 5  | 4  | 2.8 | 2.5 | 9.9E-20    |
| IPI00218733 | Superoxide dismutase [Cu_Zn]                | SOD1     | 2  | 1  | 2.6 | 2.3 | 1.4206E-06 |
| IPI00022314 | Superoxide dismutase [Mn]_ mitochondrial    | SOD2     | no | 2  | no  | 2.8 | 0.00376528 |
| IPI00219757 | Glutathione S_transferase P                 | GSTP1    | 2  | 2  | 2.7 | 2.3 | 4.6111E-08 |
| IPI00909073 | Heat shock 70 kDa protein 1                 | HSPA1    | 4  | 4  | 2.6 | 3   | 9.9E-20    |
| IPI00643152 | Heat shock 70 kDa protein 1L                | HSPA1L   | 4  | 4  | 2.1 | 2.4 | 9.9E-20    |
| IPI00002966 | HSPA4 Heat shock 70 kDa protein 4           | HSPA4    | 2  | 2  | 2.3 | 2   | 3.7981E-06 |
| IPI00003362 | HSPA5 protein                               | HSPA5    | 11 | 17 | 2.5 | 2.2 | 9.9E-20    |
| IPI00339269 | Heat shock 70 kDa protein 6                 | HSPA6    | 3  | 3  | 2.2 | 3   | 9.9E-20    |
| IPI00939595 | Heat shock cognate 71 kDa protein           | HSPA8    | 11 | 13 | 2.3 | 2.6 | 9.9E-20    |
| IPI00922694 | Stress_70 protein_ mitochondrial            | HSPA9    | 2  | 3  | 2.8 | 3.4 | 2.2204E-16 |
| IPI00414676 | Heat shock protein HSP 90_beta              | HSP90    | 11 | 13 | 2.3 | 2.4 | 9.9E-20    |
| IPI00411633 | Heat shock protein beta (Fragment)          | HSP90AB1 | 2  | 3  | 2.3 | 2.6 | 9.9E-20    |
| IPI00917575 | heat shock protein_ mitochondrial           | HSPD1    | 7  | 7  | 2.6 | 2.1 | 9.9E-20    |
| IPI00025512 | Heat shock protein beta_1                   | HSPB1    | 3  | 3  | 2.5 | 2.5 | 3.8206E-09 |
| IPI00878551 | Protein disulfide_isomerase                 | PDIA     | 6  | 7  | 2.9 | 2   | 9.9E-20    |
| IPI00025252 | Protein disulfide_isomerase A3              | PDIA3    | 6  | 8  | 2.5 | 2.2 | 9.9E-20    |
| IPI00299571 | Isoform 2 of Protein disulfide_isomerase A6 | PDIA6    | 4  | 6  | 2.2 | 2.3 | 9.9E-20    |
| IPI00010796 | Protein disulfide_isomerase                 | P4HB     | 7  | 8  | 2.8 | 2.2 | 9.9E-20    |
| IPI00925747 | PPIA Peptidyl_prolyl cis_trans isomerase    | PPIA     | 5  | 5  | 2.5 | 2.3 | 9.9E-20    |
| IPI00646304 | Peptidyl_prolyl cis_trans isomerase B       | PPIB     | 4  | 6  | 2.2 | 1.9 | 9.9E-20    |
| IPI00020599 | Calreticulin                                | CALR     | 8  | 7  | 2.7 | 1.8 | 9.9E-20    |
| IPI00290770 | T_complex protein 1 subunit gamma isoform b | CCT3     | 2  | 4  | 2.3 | 2.9 | 9.9E-20    |
| IPI00797206 | CCT8 Protein                                | CCT8     | 2  | 2  | 1.9 | 2.4 | 0.00153141 |
| IPI00020984 | Calnexin                                    | CANX     | 2  | 3  | 2.4 | 2.2 | 9.9E-20    |
| IPI00032140 | SERPINH1 Serpin H1                          | SERPINH1 | 6  | 9  | 2.6 | 1.9 | 9.9E-20    |
| IPI00298268 | Prostaglandin G/H synthase 1                | PTGS1    | 3  | 2  | 2.6 | 1.9 | 9.9E-20    |



## Cytoskeleton rearrangement

|             |                                                |        |    |    |     |     |            |
|-------------|------------------------------------------------|--------|----|----|-----|-----|------------|
| IPI00418471 | VIM Vimentin                                   | VIM    | 31 | 32 | 2.5 | 1.9 | 9.9E-20    |
| IPI00790339 | ACTG1 22 kDa protein                           | ACTG1  | 2  | 3  | 3.0 | 2.7 | 9.90E-20   |
| IPI00942659 | ACTB 14 kDa protein                            | ACTB   | 2  | 3  | 3.0 | 2.7 | 9.9E-20    |
| IPI00021428 | Actin_ alpha skeletal muscle                   | ACTA1  | 3  | 6  | 2.5 | 2.5 | 9.9E-20    |
| IPI00013508 | Alpha_actinin_1                                | ACTN1  | 9  | 9  | 2.4 | 2.1 | 9.9E-20    |
| IPI00013808 | Alpha_actinin_4                                | ACTN4  | 11 | 11 | 2.6 | 2.3 | 9.9E-20    |
| IPI00174849 | Tubulin beta_8 chain B                         | TUBA   | 5  | 5  | 2.6 | 2.3 | 9.9E-20    |
| IPI00646909 | Tubulin alpha_8 chain                          | TUBA8  | 8  | 10 | 2.6 | 2.5 | 9.9E-20    |
| IPI00007750 | Tubulin alpha_4A chain                         | TUBA4A | 10 | 13 | 2.5 | 2.5 | 9.9E-20    |
| IPI00180675 | Tubulin alpha_1A chain                         | TUBA1A | 13 | 15 | 2.5 | 2.4 | 9.9E-20    |
| IPI00607818 | myosin_14 isoform 1                            | MYH14  | 2  | 1  | 2.0 | 2.2 | 9.9E-20    |
| IPI00033494 | Myosin regulatory light chain 12B              | MYL12B | 2  | 2  | 2.0 | 2.2 | 9.9E-20    |
| IPI00335168 | Myosin light polypeptide 6                     | MYL6   | 2  | 3  | 2.5 | 2.4 | 9.9E-20    |
| IPI00141318 | Isoform 1 of Cytoskeleton_associated protein 4 | CKAP4  | 4  | 3  | 2.2 | 1.4 | 1.2437E-12 |
| IPI00014898 | Isoform 1 of Plectin_1                         | PLEC   | 35 | 35 | 2.3 | 1.7 | 9.9E-20    |
| IPI00644576 | Filamin A_ alpha                               | FLNA   | 16 | 22 | 2.2 | 2.3 | 9.9E-20    |
| IPI00178352 | Filamin_C                                      | FLNC   | 2  | 2  | 3.2 | 2   | 0.00715924 |
| IPI00514204 | Lamin A                                        | LMNA   | 4  | 4  | 3.8 | 2.3 | 9.9E-20    |
| IPI00298994 | Talin_1                                        | TLN1   | 4  | 2  | 2.4 | 2.3 | 2.7063E-05 |
| IPI00000230 | Tropomyosin alpha_1 chain isoform 2            | TPM1   | 2  | 1  | 3.1 | 3   | 9.9E-20    |
| IPI00903145 | Radixin                                        | RDX    | 2  | 2  | 2.2 | 1.8 | 9.9E-20    |
| IPI00013991 | Tropomyosin beta chain                         | TPM2   | 3  | 2  | 3.0 | 2.9 | 9.9E-20    |
| IPI00219365 | Moesin                                         | MSN    | 2  | 2  | 2.2 | 1.8 | 9.9E-20    |
| IPI00384282 | Cytovillin 2                                   | EZR    | 2  | 2  | 2.2 | 1.8 | 9.9E-20    |
| IPI00793184 | Isoform 2 of Peripherin                        | PRPH   | 3  | 3  | 3.3 | 3   | 9.9E-20    |
| IPI00291175 | Isoform 1 of Vinculin                          | VCL    | 3  | 4  | 3.1 | 2.6 | 1.2836E-06 |
| IPI00216691 | Profilin_1                                     | PFN1   | 5  | 5  | 2.8 | 2.5 | 9.4594E-12 |
| IPI00550363 | Transgelin_2                                   | TAGLN2 | 4  | 4  | 2.4 | 2.2 | 9.9E-20    |

|                          |                                         |        |    |    |     |     |            |
|--------------------------|-----------------------------------------|--------|----|----|-----|-----|------------|
| IPI00339225              | Isoform 5 of Fibronectin                | FN1    | 4  | 3  | 4.1 | 2   | 9.9E-20    |
| IPI00339226              | Isoform 6 of Fibronectin                | FN2    | 4  | 3  | 3.4 | 1.7 | 9.9E-20    |
| IPI00339228              | Isoform 8 of Fibronectin                | FN3    | 4  | 4  | 4.5 | 1.8 | 9.9E-20    |
| IPI00942349              | Collagen alpha_1(VI) chain              | COL6A1 | 2  | 2  | 2.9 | 1.5 | 0.00234551 |
| IPI00022200              | Collagen alpha_3(VI) chain              | COL6A3 | 10 | 13 | 2.6 | 1.9 | 9.9E-20    |
| IPI00027463              | S100A6 Protein S100_A6                  | S100A6 | 2  | 1  | 3.5 | 1.6 | 1.4612E-09 |
| IPI00257508              | Dihydropyrimidinase_related protein 2   | PPYSL2 | 5  | 5  | 2.3 | 2   | 9.9E-20    |
| <b>Metabolic enzymes</b> |                                         |        |    |    |     |     |            |
| IPI00797270              | Triosephosphate isomerase               | TPI1P2 | 8  | 9  | 3.1 | 2.4 | 9.9E-20    |
| IPI00451401              | Triosephosphate isomerase               | TPI1P1 | 7  | 8  | 3.1 | 2.6 | 9.9E-20    |
| IPI00169383              | Phosphoglycerate kinase 1               | PGK1   | 7  | 4  | 2.9 | 2.3 | 9.9E-20    |
| IPI00549725              | Phosphoglycerate mutase 1               | PGAM1  | 3  | 2  | 2.8 | 2.3 | 1.1102E-16 |
| IPI00759806              | Alpha_enolase                           | ENO1   | 8  | 11 | 2.6 | 2.3 | 9.9E-20    |
| IPI00216171              | Gamma enolase                           | ENO2   | 2  | 3  | 2.8 | 2.3 | 9.9E-20    |
| IPI00218474              | Beta_enolase                            | ENO3   | 2  | 3  | 2.8 | 2.4 | 9.9E-20    |
| IPI00910979              | Pyruvate kinase                         | PKM2   | 15 | 15 | 2.6 | 2.1 | 9.9E-20    |
| IPI00795075              | Lactate dehydrogenase A chain isoform 5 | LDHA   | 4  | 4  | 2.4 | 2   | 9.9E-20    |
| IPI00788938              | Lactate dehydrogenase                   | LDHB   | 2  | 2  | 2.4 | 2.1 | 9.9E-20    |
| IPI00027497              | Glucose_6_phosphate isomerase           | GPI    | 2  | 2  | 2.5 | 2.3 | 8.6709E-11 |
| IPI00643920              | Transketolase                           | TKT    | 8  | 8  | 2.8 | 2.1 | 9.9E-20    |
| IPI00216008              | Glucose_6_phosphate 1_dehydrogenase     | G6PD   | 4  | 6  | 2.8 | 2.5 | 9.9E-20    |
| IPI00031420              | UDP-Glucose 6_dehydrogenase             | UGDH   | 2  | 3  | 2.4 | 3.1 | 0.00136809 |
| IPI00021290              | ATP_citrate synthase                    | ACLY   | 5  | 7  | 2.2 | 2.3 | 9.9E-20    |
| IPI00908963              | ATP synthase subunit alpha              | ATP5A1 | 5  | 6  | 2.8 | 1.8 | 9.9E-20    |
| IPI00303476              | ATP synthase subunit beta               | ATP5B  | 8  | 11 | 2.7 | 2.1 | 9.9E-20    |
| IPI00027223.2            | Isocitrate dehydrogenase                | IDH1   | 2  | 2  | 2.2 | 2.6 | 6.864E-05  |
| IPI00952583              | Malate dehydrogenase                    | MDH1   | 2  | 2  | 2.2 | 1.9 | 9.9E-20    |
| IPI00291006              | Malate dehydrogenase                    | MDH2   | 9  | 10 | 2.8 | 2.7 | 9.9E-20    |
| IPI00018206              | Aspartate aminotransferase              | GOT2   | 3  | 2  | 2.5 | 2.4 | 5.9283E-08 |

|                                          |                                                     |         |    |    |     |      |            |
|------------------------------------------|-----------------------------------------------------|---------|----|----|-----|------|------------|
| IPI00016801                              | Glutamate dehydrogenase 1                           | GLUD1   | 1  | 2  | 2.5 | 2.8  | 0.00396268 |
| IPI00004358                              | Glycogen phosphorylase                              | PYGB    | 4  | 6  | 2.5 | 2.9  | 1.1545E-09 |
| IPI00026781                              | Fatty acid synthase                                 | FASN    | 18 | 19 | 2.0 | 2    | 9.9E-20    |
| <b>Pro- and anti-apoptotic factors</b>   |                                                     |         |    |    |     |      |            |
| IPI00456750                              | Niban_like protein 1                                | FAM129B |    | 2  |     | 3.6  | 1.726E-07  |
| IPI00945782                              | calmodulin isoform 2                                | CALM2   | 2  | 2  | 2.8 | 1.7  | 9.9E-20    |
| IPI00220740                              | Isoform 2 of Nucleophosmin                          | NPM1    | 2  | 1  | 2.0 | 1.3  | 5.4068E-14 |
| IPI00289758                              | Calpain_2 catalytic subunit                         | CAPN2   | 2  | 1  | 2.1 | 2.6  | 9.9E-20    |
| IPI00075248                              | Calmodulin                                          | CALM2   | 3  | 3  | 2.9 | 1.8  | 9.9E-20    |
| IPI00009236                              | Isoform Alpha of Caveolin_1                         | CAV1    | 2  | 2  | 3.2 | 2    | 9.9E-20    |
| IPI00216088                              | Cellular retinoic acid_binding protein 2            | CRABP2  | 3  | 3  | 3.1 | 4    | 0.04600809 |
| IPI00216308                              | Voltage_dependent anion_selective channel protein 1 | VDAC1   | 3  | 4  | 2.2 | 1    | 2.5761E-12 |
| IPI00024145                              | Voltage_dependent anion_selective channel protein 2 | VDAC2   | 2  | 1  | 2.3 | 1.8  | 9.9E-20    |
| <b>Signal transduction</b>               |                                                     |         |    |    |     |      |            |
| IPI00946911                              | Putative uncharacterized protein RAB7A              | RAB7A   | 2  | 1  | 2.2 | 2.4  | 4.9079E-08 |
| IPI00016342                              | Ras-related protein Rab_7a                          | RAB7A   | 3  | 2  | 2.2 | 2.2  | 9.992E-16  |
| IPI00024282                              | Ras-related protein Rab_8B                          | RAB8B   | 2  | 1  | -   | 16.8 | 9.9E-20    |
| IPI00219446                              | Phosphatidylethanolamine_binding protein 1          | PEBP1   | 2  | 1  | 2.4 | 2.5  | 2.5383E-06 |
| IPI00027434                              | Rho-related GTP_binding protein RhoC                | RHOC    | 2  | 5  | 3.0 | 2.4  | 9.9763E-11 |
| IPI00478231                              | Transforming protein RhoA                           | RHOA    | 2  | 5  | 3.0 | 2.4  | 9.9763E-11 |
| IPI00031461                              | Rab GDP dissociation inhibitor beta                 | GDI2    | 2  | 3  | 2.7 | 2.9  | 6.2343E-08 |
| IPI00552834                              | Ras homolog gene family_member C                    | RhoC    | 2  | 2  | 3.0 | 2.4  | 9.9E-20    |
| IPI00848226                              | Guanine nucleotide_binding protein subunit beta_2   | GNB2L1  | 5  | 5  | 2.0 | 1.9  | 9.9E-20    |
| <b>Translation and protein synthesis</b> |                                                     |         |    |    |     |      |            |
| IPI00396485.3                            | Elongation factor 1_alpha 1                         | EEF1A1  | 7  | 7  | 2.6 | 1.4  | 9.9E-20    |
| IPI00014424.1                            | Elongation factor 1_alpha 2                         | EEF1A2  | 2  | 2  | 2.6 | 2.6  | 9.9E-20    |
| IPI00328328.3                            | Isoform 1 of Eukaryotic initiation factor 4A_II     | EIF4A2  | 3  | 3  | 2.6 | 2.3  | 9.9E-20    |
| IPI00376005.2                            | Eukaryotic translation initiation factor 5A_1       | EIF5A1  | 5  | 3  | 2.5 | 1.6  | 9.9E-20    |

|               |                                                         |         |    |   |     |     |            |
|---------------|---------------------------------------------------------|---------|----|---|-----|-----|------------|
| IPI00006935.3 | Eukaryotic translation initiation factor 5A_2           | EIF5A2  | 3  | 2 | 2.9 | 1.7 | 9.9E-20    |
| IPI00855924.1 | Eukaryotic translation initiation factor 5A_1           | EIF5AL1 | 4  | 2 | 2.6 | 1.7 | 9.9E-20    |
| IPI00186290.6 | Elongation factor 2                                     | EEF2    | 8  | 9 | 2.2 | 2.2 | 9.9E-20    |
| IPI00789435.2 | Elongation factor 1_delta isoform 3                     | EEF1D   | 2  | 3 | 2.6 | 2.4 | 9.9E-20    |
| IPI00003815.3 | Rho GDP_dissociation inhibitor 1                        | ARHGDI1 | 3  | 2 | 2.4 | 1.8 | 3.3235E-10 |
| IPI00221224.6 | Aminopeptidase N                                        | ANPEP   | 10 | 7 | 2.8 | 1.8 | 9.9E-20    |
| IPI00026260.1 | Isoform 1 of Nucleoside diphosphate kinase B            | NME2    | 3  | 3 | 2.9 | 2.4 | 9.9E-20    |
| IPI00604590.3 | Nucleoside diphosphate kinase                           | NME2    | 3  | 4 | 2.9 | 2.9 | 9.9E-20    |
| IPI00295386.7 | Carbonyl reductase 1                                    | CBR1    | 3  | 2 | 2.5 | 2.3 | 2.1986E-08 |
| IPI00176903.2 | Polymerase I and transcript release factor              | PTRF    | 2  | 3 | 2.1 | 1.4 | 9.9E-20    |
| IPI00008530.1 | RPLP0 60S acidic ribosomal protein P0                   | RPLP0   | 4  | 2 | 2.2 | 2   | 9.9E-20    |
| IPI00926202.1 | RPL15 20 kDa protein                                    | RPL15   | 2  | 2 | 1.8 | 1.8 | 0.29751604 |
| IPI00008529.1 | 60S acidic ribosomal protein P2                         | RPLP2   | 4  | 4 | 2.2 | 1.7 | 7.2095E-06 |
| IPI00021840.1 | 40S ribosomal protein S6                                | RPS6    | 2  | 2 | 1.6 | 1.6 | 0.03311765 |
| IPI00939811.1 | RPS3 Ribosomal protein S3                               | RPS3    | 3  | 4 | 1.9 | 2   | 9.9E-20    |
| IPI00216592.2 | Heterogeneous nuclear ribonucleoproteins C1/C2          | HNRNPC  | 2  | 2 | 1.5 | 0.6 | 4.3592E-06 |
| IPI00216049.1 | Heterogeneous nuclear ribonucleoprotein K               | HNRNPK  | 4  | 4 | 2.0 | 1.6 | 9.9E-20    |
| IPI00023748.3 | Nascent polypeptide_associated complex subunit alpha    | NACA    | 2  | 2 | 2.4 | 2.3 | 9.9E-20    |
| IPI00550069.3 | RNH1 Ribonuclease inhibitor                             | RNH1    | 7  | 6 | 2.5 | 2.3 | 1.0059E-13 |
|               | Micellaneous functions                                  |         |    |   |     |     |            |
| IPI00297160.4 | Isoform 12 of CD44 antigen                              | CD44    | 2  | 1 | 3.0 | 2.2 | 1.2212E-15 |
| IPI00021766.5 | Isoform 1 of Reticulon_4                                | RTN4    | 2  | 2 | 3.0 | 5.1 | 4.0433E-10 |
| IPI00815745.2 | DBI Diazepam binding inhibitor_ splice form 1A          | DBI     | 2  | 2 | 2.8 | 2.3 | 4.2055E-08 |
| IPI00556376.2 | Collapsin response mediator protein 1 isoform 1         | CRMP1   | 2  | 2 | 2.6 | 2   | 9.9E-20    |
| IPI00411639.1 | Laminin receptor_like protein LAMRL5                    | RPSA    | 2  | 2 | 2.1 | 1.9 | 9.9E-20    |
| IPI00010951.2 | Epiplakin                                               | EPPK1   | 2  | 2 | 2.4 | 1.9 | 9.9E-20    |
| IPI00101037.3 | Reticulocalbin_3                                        | RCN3    | 3  | 1 | 3.1 | 3.2 | 2.2561E-05 |
| IPI00217906.3 | Guanine nucleotide_binding protein G(i) subunit alpha_2 | GNAI2   | 2  | 2 | 2.3 | 2.3 | 9.9E-20    |

|               |                                                        |        |   |   |     |     |            |
|---------------|--------------------------------------------------------|--------|---|---|-----|-----|------------|
| IPI00010896.3 | Chloride intracellular channel protein 1               | CLIC1  | 2 | 2 | 2.6 | 2.6 | 2.4491E-07 |
| IPI00106642.4 | Dihydropyrimidinase_like 2                             | SDF2L1 | 4 | 4 | 2.3 | 2   | 9.9E-20    |
| IPI00555577.1 | Thy_1 cell surface antigen variant (Fragment)          | THY1   | 4 | 3 | 3.2 | 2.7 | 8.5487E-15 |
| IPI00016610.2 | Poly(rC)_binding protein 1                             | PCBP1  | 3 | 3 | 2.7 | 2.1 | 3.4565E-07 |
| IPI00015842.1 | Reticulocalbin_1                                       | RCN1   | 3 | 3 | 2.4 | 1.7 | 6.3079E-07 |
| IPI00022774.3 | Transitional endoplasmic reticulum ATPase              | VCP    | 3 | 4 | 2.5 | 2   | 9.9E-20    |
| IPI00795292.1 | Isoform 3 of Nucleoside diphosphate kinase B           | NME2   | 3 | 4 | 2.9 | 2.9 | 9.9E-20    |
| IPI00908755.1 | Ubiquitin_activating enzyme E1                         | UBA1   | 2 | 2 | 2.5 | 2   | 3.394E-13  |
| IPI00024067.4 | Isoform 1 of Clathrin heavy chain 1                    | CLTC   | 6 | 8 | 2.2 | 2.1 | 9.9E-20    |
| IPI00021812.2 | Neuroblast differentiation_associated protein<br>AHNAK | AHNAK  | 2 | 2 | 2.3 | 0.2 | 9.9E-20    |
| IPI00011454   | Isoform 2 of Neutral alpha_glucosidase AB              | GANAB  | 2 | 2 | 2.6 | 2.7 | 2.0668E-06 |
| IPI00914566   | Farnesyl pyrophosphate synthase                        | FDPS   | 2 | 2 | 2.6 | 1.9 | 9.2379E-06 |

**Table S2. Differentially expressed cellular proteins in HGFs in response to *P. gingivalis* LPS<sub>1435/1449</sub> and LPS<sub>1690</sub> identified by LC-MS/MS approach.**

| Uniprot ID                          | Description                                            | Gene     | Peptides                   |                       | Fold change<br>Pg LPS / control |                       | P Value  |
|-------------------------------------|--------------------------------------------------------|----------|----------------------------|-----------------------|---------------------------------|-----------------------|----------|
|                                     |                                                        |          | PgLPS <sub>1435/1449</sub> | PgLPS <sub>1690</sub> | PgLPS <sub>1435/1449</sub>      | PgLPS <sub>1690</sub> |          |
| <b>Immuno-inflammatory activity</b> |                                                        |          |                            |                       |                                 |                       |          |
| IPI00023673                         | Galectin-3_binding protein                             | LGALS3BP | 4                          | 6                     | 9.5                             | 7.5                   | 5.63E-07 |
| IPI00219219                         | Galectin-1                                             | LGALS1   | 4                          | 3                     | 23.9                            | 7.1                   | 0.093671 |
| IPI00451401                         | Triosephosphate isomerase                              | TPI1     | 2                          | 2                     | 8.1                             | 5.0                   | 7.39E-06 |
| IPI00004656                         | Beta-2-microglobulin                                   | B2M      | 3                          | 2                     | 2.2                             | 6.6                   | 0.008975 |
| IPI00025252                         | Protein disulfide_isomerase A3                         | PDIA3    | 3                          | 2                     | 2.8                             | 4.9                   | 0.018986 |
| IPI00003865                         | Isoform 1 of Heat shock cognate 71 kDa protein         | HSPA8    | 3                          | 2                     | 2.5                             | 4.1                   | 0.094634 |
| IPI00295741                         | Cathepsin B                                            | CTSB     | 9                          | 7                     | 10.5                            | 9.6                   | 9.9E-20  |
| IPI00012887                         | Cathepsin L1                                           | CTSL1    | 4                          | 4                     | 6.2                             | 14.8                  | 0.006745 |
| IPI00305477                         | Cystatin_SN                                            | CST1     | 2                          | 2                     | 3.4                             | 4.6                   | 0.000109 |
| IPI00032293                         | Cystatin C                                             | CST3     | 3                          | 3                     | 6.2                             | 10.1                  | 0.212841 |
| IPI00018219                         | Transforming growth factor_beta                        | TGFBI    | 2                          | 2                     | 2.8                             | 3.6                   | 0.032882 |
| IPI00894247                         | Latent-transforming growth factor beta-binding protein | LTBP1    | 3                          | 3                     | 2.0                             | 1.3                   | 0.403168 |
| IPI00455315                         | Isoform 1 of Annexin A2                                | ANXA2    | 5                          | 4                     | 5.0                             | 8.3                   | 4.76E-05 |
| IPI00008561                         | Matrix metalloproteinase 1                             | MMP1     | 12                         | 12                    | 8.1                             | 6.3                   | 9.9E-20  |
| IPI00027780                         | Matrix metalloproteinase 2                             | MMP2     | 14                         | 15                    | 6.8                             | 4.0                   | 9.9E-20  |
| IPI00032292                         | Metalloproteinase inhibitor 1                          | TIMP1    | 8                          | 8                     | 13.1                            | 7.1                   | 9.9E-20  |
| IPI00027166                         | Metalloproteinase inhibitor 2                          | TIMP2    | 4                          | 3                     | 3.2                             | 4.3                   | 3.53E-07 |
| IPI00007709                         | ADAM28 Isoform 1                                       | ADAM28   | 2                          | 2                     | 5.8                             | 4.7                   | 0.001652 |
| <b>ECM matrix proteins</b>          |                                                        |          |                            |                       |                                 |                       |          |
| IPI00020599                         | Calreticulin                                           | CALR     | 4                          | 5                     | 6.2                             | 329.0                 | 0.042337 |
| IPI00219403                         | Isoform D of Decorin                                   | DCN      | 4                          | 4                     | 4.5                             | 142.2                 | 7.29E-09 |
| IPI00219400                         | Isoform B of Decorin                                   | DCN      | 3                          | 3                     | 4.3                             | 118.6                 | 1.6E-07  |
| IPI00942349                         | Collagen alpha-1(VI) chain                             | COL6A1   | 11                         | 9                     | 6.1                             | 8.0                   | 9.9E-20  |
| IPI00915389                         | Protein COL6A2                                         | COL6A2   | 2                          | 2                     | 3.0                             | 4.1                   | 1.57E-05 |

|             |                                                        |          |    |    |     |      |           |
|-------------|--------------------------------------------------------|----------|----|----|-----|------|-----------|
| IPI00871621 | COL6A3                                                 | COL6A3   | 37 | 34 | 6.4 | 6.0  | 9.9E-20   |
| IPI00909936 | Collagen alpha-2(I) chain                              | COL1A2   | 4  | 4  | 5.9 | 7.9  | 9.9E-20   |
| IPI00299738 | Procollagen C-endopeptidase enhancer 1                 | PCOLCE   | 11 | 6  | 4.7 | 5.4  | 1.97E-12  |
| IPI00942809 | LAMA2                                                  | LAMA2    | 3  | 1  | 1.5 | 3.2  | 0.044728  |
| IPI00852737 | LAMB1 95 kDa protein                                   | LAMB1    | 5  | 5  | 7.2 | 11.3 | 9.9E-20   |
| IPI00296922 | Laminin subunit beta-2                                 | LAMB2    | 3  | 4  | 4.5 | 9.0  | 0.000124  |
| IPI00022418 | Isoform 1 of Fibronectin                               | FN1      | 19 | 19 | 6.0 | 5.5  | 9.9E-20   |
| IPI00019439 | Isoform 1 of Fibrillin-2                               | FBLN2    | 6  | 5  | 1.4 | 4.7  | 0.473587  |
| IPI00296534 | Isoform D of Fibulin-1                                 | FBLN1    | 15 | 13 | 5.7 | 12.9 | 9.9E-20   |
| IPI00014572 | Secreted protein- acidic- cysteine-rich-isoform CRA-a  | SPARC    | 12 | 12 | 4.7 | 7.7  | 9.9E-20   |
| IPI00006114 | plasminogen activator inhibitor-1 isoform 2 precursor  | SERPINF1 | 11 | 10 | 3.9 | 3.7  | 3.19E-10  |
| IPI00009890 | SERPINE2                                               | SERPINE2 | 10 | 10 | 4.7 | 6.9  | 9.9E-20   |
| IPI00010790 | Biglycan                                               | BGN      | 5  | 5  | 5.4 | 15.0 | 9.9E-20   |
| IPI00018769 | THBS2 Thrombospondin-2                                 | THBS2    | 2  | 2  | 3.6 | 3.5  | 0.044504  |
| IPI00296099 | THBS1 Thrombospondin-1                                 | THBS1    | 8  | 7  | 5.0 | 8.5  | 1.7E-06   |
| IPI00939199 | ABI3BP                                                 | ABI3BP   | 6  | 6  | 3.0 | 4.6  | 1.06E-10  |
| IPI00020986 | Lumican                                                | LUM      | 7  | 7  | 4.2 | 7.0  | 3.18E-10  |
| IPI00384542 | Isoform 2 of Nidogen-1                                 | NID1     | 5  | 2  | 6.0 | 7.7  | 9.9E-20   |
| IPI00028908 | Isoform 1 of Nidogen-2                                 | NID2     | 6  | 6  | 6.7 | 11.0 | 1.96E-12  |
| IPI00465084 | Desmin                                                 | DES      | 4  | 3  | 0.9 | 2.6  | 0.999998  |
| IPI00006662 | Apolipoprotein D                                       | APOD     | 7  | 7  | 5.6 | 3.7  | 2.48E-13  |
| IPI00297284 | insulin_like growth factor_binding protein 2 precursor | IGFBP2   | 9  | 8  | 2.0 | 1.4  | 0.0713022 |
| IPI00305380 | Insulin_like growth factor_binding protein 4           | IGFBP4   | 4  | 4  | 3.3 | 4.7  | 0.045506  |
| IPI00016915 | Insulin_like growth factor_binding protein 7           | IGFBP7   | 7  | 5  | 6.1 | 3.4  | 0.005738  |
| IPI00045396 | Isoform 2 of Calumenin                                 | CALU     | 4  | 3  | 5.2 | 6.7  | 9.9E-20   |
| IPI00295542 | Nucleobindin-1                                         | NUCB1    | 4  | 5  | 5.1 | 4.5  | 4.88E-15  |
| IPI00003351 | Isoform 1 of Extracellular matrix protein 1            | ECM1     | 4  | 3  | 4.4 | 13.1 | 0.002005  |
| IPI00024284 | heparan sulfate proteoglycan core protein              | HSPG2    | 3  | 4  | 4.6 | 4.7  | 3.8E-07   |
| IPI00029568 | Pentraxin_related protein PTX3                         | PTX3     | 3  | 3  | 3.8 | 2.6  | 0.000268  |
| IPI00010796 | Protein disulfide_isomerase                            | P4HB     | 3  | 2  | 7.2 | 4.9  | 4.93E-12  |

|             |                                                      |          |   |   |      |      |          |
|-------------|------------------------------------------------------|----------|---|---|------|------|----------|
| IPI00026314 | Isoform 1 of Gelsolin                                | GSN      | 3 | 4 | 2.7  | 3.1  | 3.11E-11 |
| IPI00033466 | C type lectin domain family 11 member A              | CLEC11A  | 2 | 3 | 7.3  | 99.6 | 9.9E-20  |
| IPI00921614 | EF-hand calcium-binding domain-containing protein 8  | EFCAB6   | 2 | 2 | 3.5  | 5.8  | 0.038821 |
| IPI00022974 | Prolactin-inducible protein                          | PIP      | 2 | 2 | 4.4  | 4.5  | 0.003077 |
| IPI00216003 | Cullin-5                                             | CUL5     | 2 | 2 | 4.2  | 6.6  | 0.047657 |
| IPI00418220 | Isoform 1 of Zinc finger protein ZFAT                | ZFAT     | 2 | 2 | 16.4 | 13.4 | 0.009872 |
| IPI00001453 | Alpha-internexin                                     | INA      | 2 | 2 | 21.2 | 27.8 | 0.013897 |
| IPI00456429 | ubiquitin and ribosomal protein L40 precursor        | UBA52    | 2 | 2 | 4.1  | 7.3  | 9.9E-20  |
| IPI00291262 | Isoform 1 of Clusterin                               | CLU      | 2 | 2 | 1.6  | 1.6  | 0.420506 |
| IPI00303335 | Nebulin                                              | NEB      | 2 | 2 | 0.8  | 25.3 | 0.919507 |
| IPI00298285 | Isoform 1 of Receptor tyrosine-protein kinase erbB-3 | ERBB3    | 2 | 2 | 2.5  | 4.1  | 0.003232 |
| IPI00550746 | Nuclear migration protein nudC                       | NUDC     | 2 | 1 | 2.9  | 4.3  | 0.000583 |
| IPI00887675 | golgin subfamily A member 6-like protein 1           | GOLGA6L1 | 2 | 1 | 5.1  | 1.9  | 4.18E-06 |
| IPI00017367 | Radixin- isoform CRA_a                               | RDX      | 2 | 1 | 3.6  | 3.8  | 1.83E-09 |
| IPI00219365 | Moesin                                               | MSN      | 2 | 2 | 3.6  | 3.7  | 1.83E-09 |
| IPI00305975 | Spondin-2                                            | SPON2    | 2 | 3 | 13.4 | 4.4  | 0.005584 |
| IPI00513767 | Prostaglandin D2 synthase 21kDa                      | PTGDS    | 2 | 2 | 5.8  | 5.8  | 9.9E-13  |
| IPI00945507 | Putative uncharacterized protein SUCLG2              | SUCLG2   | 2 | 2 | 8.3  | 12.0 | 2.64E-10 |
| IPI00418780 | Isoform 3 of Regulator of G-protein signaling 3      | RGS3     | 2 | 1 | 12.1 | 9.9  | 0.00844  |
| IPI00006196 | Isoform 2 of Nuclear mitotic apparatus protein 1     | NUMA1    | 2 | 2 | 8.0  | 15.5 | 1.64E-09 |
| IPI00477355 | KIF1-binding protein                                 | KIAA     | 2 | 1 | 0.8  | 2.1  | 0.798442 |
| IPI00914602 | amyloid beta A4 protein                              | APP      | 2 | 1 | 6.5  | 1.8  | 1.01E-06 |
| IPI00646748 | Tropomyosin 2                                        | TPM2     | 2 | 1 | 5.8  | 3.9  | 9.9E-20  |
| IPI00029739 | Isoform 1 of Complement factor H                     | CFH      | 2 | 1 | 5.9  | 4.1  | 0.001987 |
| IPI00220625 | Isoform 3 of A_kinase anchor protein 9               | AKAP9    | 2 | 1 | 3.8  | 5.0  | 1.01E-05 |
| IPI00871702 | Isoform 1 of Dysferlin                               | DYSF     | 2 | 1 | 2.7  | 2.4  | 3.05E-11 |
| IPI00792713 | Isoform 2                                            | WHSC1L1  | 2 | 1 | 3.8  | 1.9  | 7.85E-06 |
| IPI00298961 | Exportin-1                                           | XPO1     | 2 | 1 | 7.5  | 8.9  | 3.47E-07 |
| IPI00745313 | Isoform 1 of Adipocyte enhancer-binding protein 1    | AEBP1    | 2 | 2 | 0.9  | 0.9  | 0.778485 |
| IPI00022465 | Isoform 1 of Citron Rho-interacting kinase           | CIT      | 2 | 1 | 2.3  | 2.9  | 0.006317 |



|                      |                                                                                |             |                 |                 |                    |              |              |
|----------------------|--------------------------------------------------------------------------------|-------------|-----------------|-----------------|--------------------|--------------|--------------|
| IPI00940990          | Dickkopf-related protein 3                                                     | DKK3        | 6               | 6               | 10.8               | 245.3        | 4.47E-08     |
| <b>Miscellaneous</b> |                                                                                |             |                 |                 |                    |              |              |
| IPI00219757          | Glutathione S-transferase P                                                    | GSTP1       | 2               | 2               | 1.2                | 2.2          | 0.005345     |
| IPI00465248          | Isoform alpha-enolase of Alpha-enolase                                         | ENO1        | 6               | 4               | 2.4                | 2.8          | 0.000497     |
| IPI00218474          | Isoform 1 of Beta-enolase                                                      | ENO3        | 2               | 1               | 2.2                | 2.9          | 9.96E-05     |
| IPI00217966          | Isoform 1 of L-lactate dehydrogenase A chain                                   | LDHA        | 6               | 3               | 1.6                | 2.9          | 0.946742     |
| IPI00788938          | lactate dehydrogenase                                                          | LDHB        | 2               | 2               | 1.6                | 5.8          | 0.642434     |
| IPI00549725          | Phosphoglycerate mutase 1                                                      | PGAM1       | 2               | 2               | 7.0                | 4.7          | 1.23E-08     |
| IPI00642888          | Isoform E of Chloride transport protein 6                                      | CLCN6       | 2               | 2               | 13.0               | 17.4         | 0.000475     |
| IPI00465439          | Fructose-bisphosphate aldolase A                                               | ALDOA       | 2               | 2               | 7.8                | 3.5          | 0.003169     |
| <b>MW</b>            |                                                                                |             |                 |                 |                    |              |              |
|                      | <b>Unique proteins induced by <i>P. gingivalis</i> LPS<sub>1435/1449</sub></b> | <b>Gene</b> | <b>Coverage</b> | <b>Peptides</b> | <b>Amino acids</b> | <b>(kDa)</b> | <b>Score</b> |
| IPI00097434          | Interleukin-20 receptor subunit beta                                           | IL20RB      | 7.4             | 2               | 311                | 35.1         | 21.84        |
| IPI00398443          | Isoform 3 of Serine/threonine-protein kinase WNK4                              | WNK4        | 1.97            | 2               | 1165               | 126.5        | 13.54        |
| IPI00306718          | Synaptonemal complex protein 2                                                 | SYCP2       | 1.44            | 2               | 1530               | 175.5        | 10.23        |
| IPI00012503          | Isoform Sap-mu-0 of Proactivator polypeptide                                   | PSAP        | 2.86            | 2               | 524                | 58.1         | 10.2         |
| IPI00783524          | MLH1-Ex(15-18) isoform                                                         | MLH1        | 10.61           | 2               | 179                | 20.3         | 9.92         |
| IPI00017704          | Coactosin-like protein                                                         | COTL1       | 11.27           | 2               | 142                | 15.9         | 9.74         |
| IPI00909711          | Vinculin                                                                       | VCL         | 6.42            | 2               | 327                | 36.2         | 8.48         |
| IPI00398776          | Isoform 7 of Plectin-1                                                         | PLEC1       | 0.64            | 2               | 4515               | 512.3        | 8.3          |
| IPI00217784          | Isoform 4 of Protein NDRG4                                                     | NDRG4       | 6.49            | 2               | 339                | 37           | 2.71         |
| IPI00374864          | Late cornified envelope protein 3B                                             | LCE3B       | 36.84           | 4               | 95                 | 9.8          | 2.66         |
| IPI00749245          | Secreted frizzled-related protein 1                                            | SFRP1       | 5.1             | 1               | 314                | 35.4         | 2.52         |
| IPI00908476          | Transmembrane BAX inhibitor motif-containing protein 4                         | TMBIM4      | 10.12           | 1               | 168                | 19           | 2.5          |
| IPI00414347          | Isoform 2 of Ankyrin repeat and SOCS box protein 18                            | ASB18       | 5.26            | 1               | 437                | 47.5         | 2.15         |
| IPI00885137          | Isoform 4 of Sodium channel and clathrin linker 1                              | SCLT1       | 18.99           | 1               | 79                 | 9.3          | 2.13         |
| IPI00015842          | Reticulocalbin-1                                                               | RCN1        | 8.76            | 1               | 331                | 38.9         | 0            |
| IPI00909283          | Cadherin-11                                                                    | CDH11       | 5.13            | 1               | 779                | 85.5         | 0            |
| IPI00910553          | moderately similar to Peroxiredoxin-6                                          | PRDX6       | 16.83           | 1               | 101                | 11.2         | 3.9          |

| <b>Unique proteins induced by <i>P. gingivalis</i> LPS<sub>1690</sub></b> |                                                 | <b>Gene</b> | <b>Coverage</b> | <b>Peptides</b> | <b>Amino acids</b> | <b>MW (kDa)</b> | <b>Score</b> |
|---------------------------------------------------------------------------|-------------------------------------------------|-------------|-----------------|-----------------|--------------------|-----------------|--------------|
| IPI00878107                                                               | Interleukin-6                                   | IL-6        | 6.35            | 1               | 252                | 27.4            | 3.57         |
| IPI00654838                                                               | Isoform 3 of NADPH oxidase activator 1          | NOXA1       | 4.68            | 1               | 427                | 45.2            | 3.51         |
| IPI00410150                                                               | Isoform 1 of Usherin                            | USH2A       | 0.6             | 1               | 5202               | 575.2           | 3.05         |
| IPI00847815                                                               | Isoform 3 of Solute carrier family 25 member 35 | SLC25A35    | 8.36            | 1               | 287                | 30.7            | 2.75         |
| IPI00059240                                                               | Insulin gene enhancer protein ISL-2             | ISL2        | 6.13            | 1               | 359                | 39.7            | 2.45         |
| IPI00001677                                                               | Outer dense fiber protein 1                     | ODF1        | 9.6             | 1               | 250                | 28.3            | 2.39         |
| IPI00895907                                                               | Rho guanine nucleotide exchange factor 18       | ARHGEF18    | 2.07            | 1               | 1015               | 114             | 2.28         |
| IPI00456969                                                               | Cytoplasmic dynein 1 heavy chain 1              | DYNC1H1     | 0.17            | 1               | 4646               | 532.1           | 2.2          |
| IPI00024282                                                               | Ras-related protein Rab-8B                      | RAB8B       | 6.28            | 1               | 207                | 23.6            | 1.89         |
| IPI00829922                                                               | Isoform 2 of Zinc transporter 8                 | ZNT8        | 2.81            | 1               | 320                | 35              | 12.01        |
| IPI00442805                                                               | highly similar to Ligatin                       | DMXL2       | 1.82            | 1               | 440                | 49.5            | 11.65        |
| IPI00641216                                                               | Putative uncharacterized protein TMCC2          | TMCC2       | 8.59            | 1               | 256                | 28.1            | 8.97         |
| IPI00216362                                                               | Isoform 2 of Otoferlin                          | OTOF        | 0.65            | 1               | 1230               | 140.2           | 3.72         |
| PI00739661                                                                | otogelin isoform 2                              | OTOG        | 0.32            | 1               | 2852               | 306.8           | 3.58         |

**Table S3. Differentially regulated secretory proteins in HGFs in response to *P. gingivalis* LPS<sub>1435/1449</sub> and LPS<sub>1690</sub> identified by LC-MS/MS approach.**

| Position | Gene symbol | Gene name                                       | Fold changes          |                       |
|----------|-------------|-------------------------------------------------|-----------------------|-----------------------|
|          |             |                                                 | PgLPS <sub>1435</sub> | PgLPS <sub>1690</sub> |
| A01      | ALB         | Albumin                                         | 7.07                  | 14.22                 |
| A02      | ALOX12      | Arachidonate 12-lipoxygenase                    | 2.14                  | 1.07                  |
| A03      | ANGPTL7     | Angiopoietin-like 7                             | 1.2                   | 0.67                  |
| A04      | AOX1        | Aldehyde oxidase 1                              | 1.1                   | 1.27                  |
| A05      | APOE        | Apolipoprotein E                                | 1.29                  | 0.95                  |
| A06      | ATOX1       | ATX1 antioxidant protein 1 homolog (yeast)      | 1.15                  | 1.05                  |
| A07      | BNIP3       | BCL2/adenovirus E1B 19kDa interacting protein 3 | 1.15                  | 1.2                   |
| A08      | CAT         | Catalase                                        | 1.04                  | 0.93                  |
| A09      | CCL5        | Chemokine (C-C motif) ligand 5                  | 3.19                  | 49                    |
| A10      | CCS         | Copper chaperone for superoxide dismutase       | 1.18                  | 0.99                  |
| A11      | CSDE1       | Cold shock domain containing E1, RNA-binding    | 1.02                  | 1.05                  |

|     |        |                                             |      |      |
|-----|--------|---------------------------------------------|------|------|
| A12 | CYBA   | Cytochrome b-245, alpha polypeptide         | 1.38 | 1.22 |
| B01 | CYGB   | Cytoglobin                                  | 1.45 | 0.99 |
| B02 | DGKK   | Diacylglycerol kinase, kappa                | 2.17 | 0.47 |
| B03 | DHCR24 | 24-dehydrocholesterol reductase             | 1.58 | 1.5  |
| B04 | DUOX1  | Dual oxidase 1                              | 0.51 | 0.76 |
| B05 | DUOX2  | Dual oxidase 2                              | 1.75 | 1.54 |
| B06 | DUSP1  | Dual specificity phosphatase 1              | 1.13 | 1.11 |
| B07 | EPHX2  | Epoxide hydrolase 2, cytoplasmic            | 0.81 | 0.71 |
| B08 | EPX    | Eosinophil peroxidase                       | 1.88 | 1.14 |
| B09 | FOXM1  | Forkhead box M1                             | 1.33 | 1.17 |
| B10 | GLRX2  | Glutaredoxin 2                              | 0.91 | 1.15 |
| B11 | GPR156 | G protein-coupled receptor 156              | 0.45 | 0.67 |
| B12 | GPX1   | Glutathione peroxidase 1                    | 0.98 | 0.91 |
| C01 | GPX2   | Glutathione peroxidase 2 (gastrointestinal) | 1.12 | 0.53 |
| C02 | GPX3   | Glutathione peroxidase 3 (plasma)           | 1.07 | 1.25 |

|     |       |                                                                |      |      |
|-----|-------|----------------------------------------------------------------|------|------|
| C03 | GPX4  | Glutathione peroxidase 4 (phospholipid hydroperoxidase)        | 1.13 | 1.16 |
| C04 | GPX5  | Glutathione peroxidase 5 (epididymal androgen-related protein) | 0.36 | 0.34 |
| C05 | GPX6  | Glutathione peroxidase 6 (olfactory)                           | 1.14 | 1.36 |
| C06 | GPX7  | Glutathione peroxidase 7                                       | 1.13 | 1.16 |
| C07 | GSR   | Glutathione reductase                                          | 1.44 | 1.23 |
| C08 | GSS   | Glutathione synthetase                                         | 0.98 | 0.87 |
| C09 | GSTZ1 | Glutathione transferase zeta 1                                 | 0.95 | 0.98 |
| C10 | GTF2I | General transcription factor II, i                             | 1.47 | 1.45 |
| C11 | KRT1  | Keratin 1                                                      | 1.03 | 0.72 |
| C12 | LPO   | Lactoperoxidase                                                | 1.61 | 1.05 |
| D01 | MBL2  | Mannose-binding lectin (protein C) 2, soluble (opsonic defect) | 0.98 | 0.28 |
| D02 | MGST3 | Microsomal glutathione S-transferase 3                         | 1.02 | 1.15 |
| D03 | MPO   | Myeloperoxidase                                                | 2.3  | 2.03 |

|     |        |                                                                              |      |      |
|-----|--------|------------------------------------------------------------------------------|------|------|
| D04 | MPV17  | MpV17 mitochondrial inner membrane protein                                   | 0.79 | 0.82 |
| D05 | MSRA   | Methionine sulfoxide reductase A                                             | 0.73 | 0.88 |
| D06 | MT3    | Metallothionein 3                                                            | 3.22 | 2.5  |
| D07 | MTL5   | Metallothionein-like 5, testis-specific (tesmin)                             | 0.82 | 0.77 |
| D08 | NCF1   | Neutrophil cytosolic factor 1                                                | 0.66 | 0.46 |
| D09 | NCF2   | Neutrophil cytosolic factor 2                                                | 2.04 | 1.34 |
| D10 | NME5   | Non-metastatic cells 5, protein expressed in (nucleoside-diphosphate kinase) | 1.04 | 1.29 |
| D11 | NOS2   | Nitric oxide synthase 2, inducible                                           | 1.96 | 1.1  |
| D12 | NOX5   | NADPH oxidase, EF-hand calcium binding domain 5                              | 0.45 | 1.56 |
| E01 | NUDT1  | Nudix (nucleoside diphosphate linked moiety X)-type motif 1                  | 1.09 | 0.99 |
| E02 | OXR1   | Oxidation resistance 1                                                       | 1.14 | 1.22 |
| E03 | OXS1   | Oxidative-stress responsive 1                                                | 1.01 | 1.05 |
| E04 | PDLIM1 | PDZ and LIM domain 1                                                         | 1.68 | 1.1  |

|     |        |                                                                                       |      |      |
|-----|--------|---------------------------------------------------------------------------------------|------|------|
| E05 | IPCEF1 | Interaction protein for cytohesin exchange factors 1                                  | 0.46 | 0.52 |
| E06 | PNKP   | Polynucleotide kinase 3'-phosphatase                                                  | 1.15 | 0.99 |
| E07 | PRDX1  | Peroxiredoxin 1                                                                       | 1    | 0.99 |
| E08 | PRDX2  | Peroxiredoxin 2                                                                       | 1.27 | 1.09 |
| E09 | PRDX3  | Peroxiredoxin 3                                                                       | 1.03 | 0.74 |
| E10 | PRDX4  | Peroxiredoxin 4                                                                       | 1.09 | 1.12 |
| E11 | PRDX5  | Peroxiredoxin 5                                                                       | 0.93 | 0.92 |
| E12 | PRDX6  | Peroxiredoxin 6                                                                       | 1.11 | 1.01 |
| F01 | PREX1  | Phosphatidylinositol-3,4,5-trisphosphate-dependent Rac exchange factor 1              | 1.13 | 0.99 |
| F02 | PRG3   | Proteoglycan 3                                                                        | 2.3  | 2.03 |
| F03 | PRNP   | Prion protein                                                                         | 1    | 1.24 |
| F04 | PTGS1  | Prostaglandin-endoperoxide synthase 1 (prostaglandin G/H synthase and cyclooxygenase) | 1.09 | 0.92 |

|     |        |                                                                                             |      |      |
|-----|--------|---------------------------------------------------------------------------------------------|------|------|
| F05 | PTGS2  | Prostaglandin-endoperoxide synthase 2<br>(prostaglandin G/H synthase and<br>cyclooxygenase) | 0.68 | 1.38 |
| F06 | PXDN   | Peroxidasin homolog (Drosophila)                                                            | 1.37 | 1.41 |
| F07 | PXDNL  | Peroxidasin homolog (Drosophila)-like                                                       | 2.3  | 5.83 |
| F08 | RNF7   | Ring finger protein 7                                                                       | 1.19 | 1.07 |
| F09 | SCARA3 | Scavenger receptor class A, member 3                                                        | 1.27 | 1.18 |
| F10 | SELS   | Selenoprotein S                                                                             | 1.25 | 1.31 |
| F11 | SEPP1  | Selenoprotein P, plasma, 1                                                                  | 0.89 | 0.96 |
| F12 | SFTPD  | Surfactant protein D                                                                        | 1    | 0.88 |
| G01 | SGK2   | Serum/glucocorticoid regulated kinase 2                                                     | 1.09 | 1.67 |
| G02 | SIRT2  | Sirtuin (silent mating type information<br>regulation 2 homolog) 2 ( <i>S. cerevisiae</i> ) | 0.91 | 0.78 |
| G03 | SOD1   | Superoxide dismutase 1, soluble                                                             | 1.24 | 1.43 |
| G04 | SOD2   | Superoxide dismutase 2, mitochondrial                                                       | 1.11 | 16   |
| G05 | SOD3   | Superoxide dismutase 3, extracellular                                                       | 1.23 | 1.64 |



|     |        |                                                 |      |      |
|-----|--------|-------------------------------------------------|------|------|
| G06 | SRXN1  | Sulfiredoxin 1 homolog ( <i>S. cerevisiae</i> ) | 1.05 | 0.8  |
| G07 | STK25  | Serine/threonine kinase 25 (STE20 homolog)      | 0.79 | 0.7  |
| G08 | TPO    | Thyroid peroxidase                              | 0.55 | 0.55 |
| G09 | TTN    | Titin                                           | 1.1  | 1.11 |
| G10 | TXNDC2 | Thioredoxin domain containing 2<br>(spermatzoa) | 0.4  | 0.75 |
| G11 | TXNRD1 | Thioredoxin reductase 1                         | 1.12 | 1.26 |
| G12 | TXNRD2 | Thioredoxin reductase 2                         | 1.06 | 1.06 |

---

**Table S4. Differential expression profile of genes associated with oxidative stress and antioxidant defense in HGFs in response to *P. gingivalis* LPS<sub>1435/1449</sub> and LPS<sub>1690</sub>.**

---

| <b>Primers</b> | <b>Sequence (5'-3')</b>       |
|----------------|-------------------------------|
| CTSB-F         | AAT GCG CAC GTC AGC GTG GA    |
| CTSB-R         | GAC TGG CAC GAC AGG CCC AC    |
| CST3-F         | CGC AGC GGG TCC TCT CTA TCT A |
| CST3-R         | CCA TGG TCG GCT AGG ACG CG    |
| PPIA-F         | AGG GTG GTG ACT TTA CAC GC    |
| PPIA-R         | ATC CAG CCA TTC AGT CTT GG    |
| ADAM 28-F      | CAG TTC CTG CAG CCG TCT CAG C |
| ADAM 28-R      | CCC GCA GTG TGG GGC ATG TG    |
| TXN1-F         | CTG CTT TTC AGG AAG CCT TG    |
| TXN1-R         | TGT TGG CAT GCA TTT GAC TT    |
| TXN2-F         | AGC CCG GAC AAT ATA CAC CA    |
| TXN2-R         | AAT ATC CAC CTT GGC CAT CA    |
| PRDX1-F        | TTT GGT ATC AGA CCC GAA GC    |
| PRDX1-R        | TCC CCA TGT TTG TCA GTG AA    |

---

---

|                   |                               |
|-------------------|-------------------------------|
| PRDX2-F           | CCA GAC GCT TGT CTG AGG AT    |
| PRDX2-R           | ACG TTG GGC TTA ATC GTG TC    |
| SOD1-F            | AGG GCA TCA TCA ATT TCG AG    |
| SOD1-R            | TGC CTC TCT TCA TCC TTT GG    |
| MnSOD-F           | CTG ATT TGG ACA AGC AGC AA    |
| MnSOD-R           | CTG GAC AAA CCT CAG CCC TA    |
| $\beta$ -actin-F  | TTG GCA ATG AGC GGT T         |
| $\beta$ -actin -R | AGT TGA AGG TAG TTT CGT GGA T |

---

**Table S5. Nucleotide sequences of primers used for real-time qPCR**
